# Supplementary material for: Gain-of-function mutations of AtNHX1 suppress sos1 salt sensitivity and improve salt tolerance in Arabidopsis
Source: PubMed Central journal article supplement (PMC10441915; doi:10.1007/s44154-021-00014-1), 2021-11-22
Supplement: 44154_2021_14_MOESM1_ESM.pdf [file 44154_2021_14_MOESM1_ESM.pdf]

# SUPPLEMENTARY MATERIALS

## **Gain-of-function mutations of *AtNHX1* suppress *sos1* salt sensitivity and improve salt tolerance in *Arabidopsis***

**Isaiah Catalino M. Pabuayon<sup>1†</sup>, Jiafu Jiang<sup>1,2†</sup>, Hongjia Qian<sup>1</sup>, Jung-Sung Chung<sup>1,3</sup>,  
Huazhong Shi<sup>1\*</sup>**

<sup>1</sup> Department of Chemistry and Biochemistry, Texas Tech University, Lubbock, TX  
79424

\*Author for Correspondence: huazhong.shi@ttu.edu; Tel: +1-806-834-7214

† These authors contributed equally to this work

<sup>2</sup> Current address: State Key Laboratory of Crop Genetics and Germplasm  
Enhancement, Key Laboratory of Landscaping, Ministry of Agriculture and Rural Affairs,  
Key Laboratory of Biology of Ornamental Plants in East China, National Forestry and  
Grassland Administration, College of Horticulture, Nanjing Agricultural University,  
Nanjing 210095, China

<sup>3</sup> Current address: Department of Agronomy, Gyeongsang National University, Jinju  
52828, South Korea

**Table S1. Primers used for site-directed mutagenesis.**

| <b><i>sup</i> Mutant</b> | <b>Primer Name</b> | <b>Primer Sequence (5' to 3')</b>             |
|--------------------------|--------------------|-----------------------------------------------|
| <i>sup1604</i>           | c65t               | 5'-atcacgcttctgtggttggtgaatctctttgttgc-3'     |
|                          | c65t_antisense     | 5'-gcaacaaagagattcaacacaaccacagaagcgtgat-3'   |
| <i>sup806</i>            | c701t              | 5'-gcaaccggtctgataagtgtgtatggtatcaagaagcta-3' |
|                          | c701t_antisense    | 5'-tagcttctgataacatacacacttatcagaccggttgc-3'  |
| <i>sup610</i>            | g748a              | 5'-ggaaggcactcaactgaccgaaagggtgcctta-3'       |
|                          | g748a_antisense    | 5'-taagggcaaccttcggtcagttgagtgccttc-3'        |
| <i>sup606</i>            | c757t              | 5'-ctgaccgagaggttgcctttatgatgcttatggcg-3'     |
|                          | c757t_antisense    | 5'-cgccataagcatcataaaggcaacctctcggtcag-3'     |
| <i>sup810</i>            | c875t              | 5'-ccattacacatggcacaatgtaatggagagctcaag-3'    |
|                          | c875t_antisense    | 5'-cttgagctctccattacattgtgcatgtgtaatgg-3'     |
| <i>sup1602</i>           | c1481t             | 5'-cttcttgacacggctcactcgaaccgtgc-3'           |
|                          | c1481t_antisense   | 5'-gcacggttcgagtgagccgtgtcaagaag-3'           |
| <i>sup908</i>            | c1534t             | 5'-ttgatgactccttcatgcatccgtctttggagg-3'       |
|                          | c1534t_antisense   | 5'-cctcaaagacggatcgcatgaaggagtcataa-3'        |

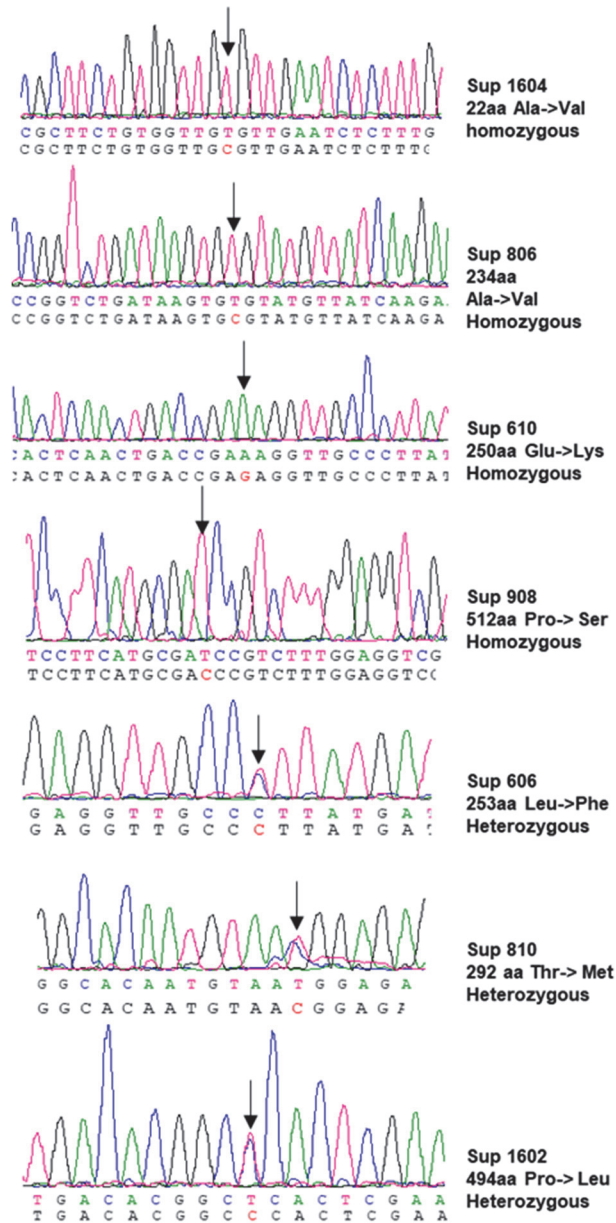

**Fig. S1. Sequencing chromatogram of the identified *sup AtNHX1* mutants.** The zygosity of the *sup* mutants were identified using their respective sequencing chromatograms. Arrows indicate the mutated nucleotides.

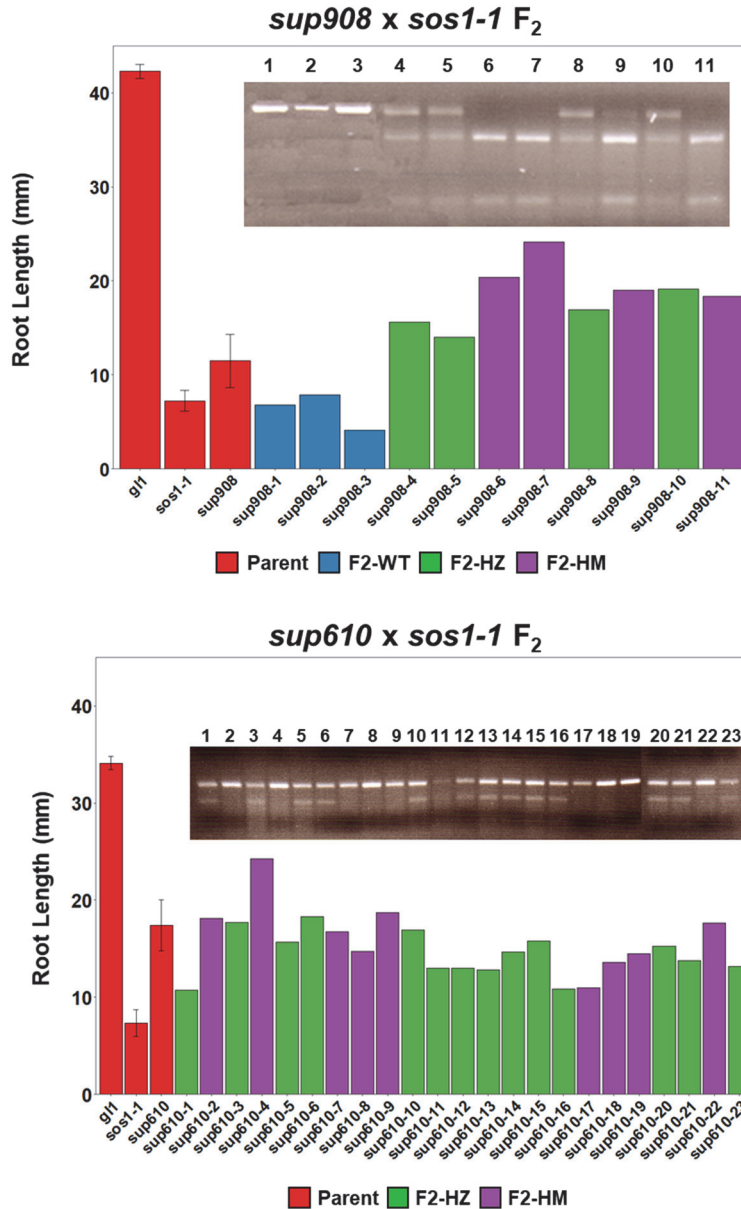

**Fig. S2.** Genotype and phenotype segregation in the F<sub>2</sub> of the genetic crosses between *sos1-1* and the *sup908* and *610* mutants, verifying the dominant inheritance pattern of the mutations. The inserts show the genotypes of the F<sub>2</sub> seedlings identified with cleaved amplified polymorphic sequence (CAPS) markers. The *sup908* allele is identified through its cleavage by *Sau3AI*, which is absent in the wild type, while the *sup610* allele is identified through its non-cleavage by *MnlI*. Root lengths of individual seedlings are shown with color-coded bars according to their zygosity for their *AtNHX1* allele.

**a**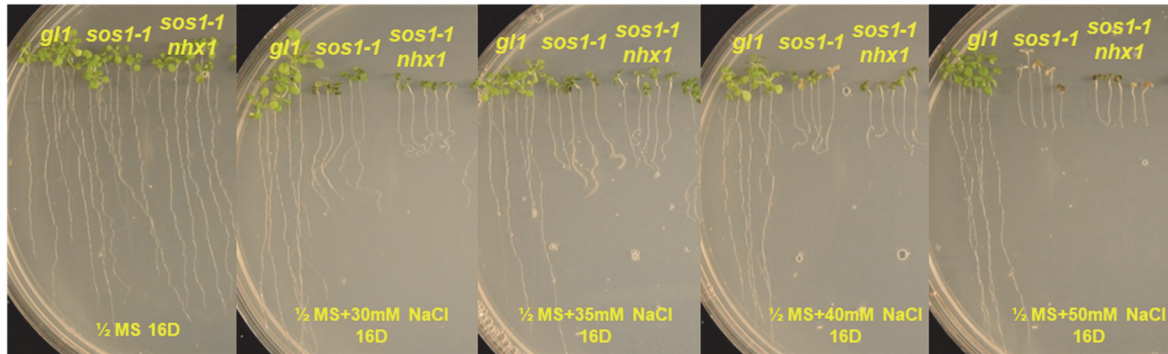**b**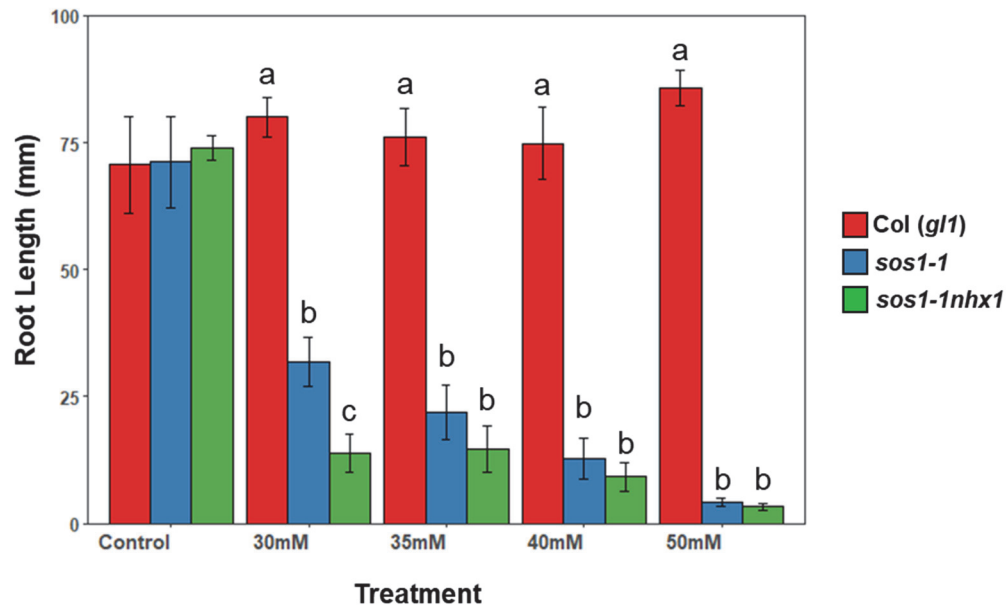

**Fig. S3. Growth phenotype of the *sos1nhx1* double mutant in response to salt stress. a**

Root growth assay of wild type Col (*gl1*), *sos1-1* and *sos1nhx1*. The *sos1nhx1* double mutant

was generated by crossing *sos1-1* with the T-DNA insertion *atnhx1* mutant allele. **b** Quantitative measurement of root lengths of these three genotypes in response to different concentrations of

NaCl. Bars represent means, and error bars represent standard errors ( $n \geq 3$ ). Statistical

significance among genotypes within treatments was computed with ANOVA and Tukey's post-

hoc HSD test ( $P < 0.05$ ) and different statistical groups are represented by letters.

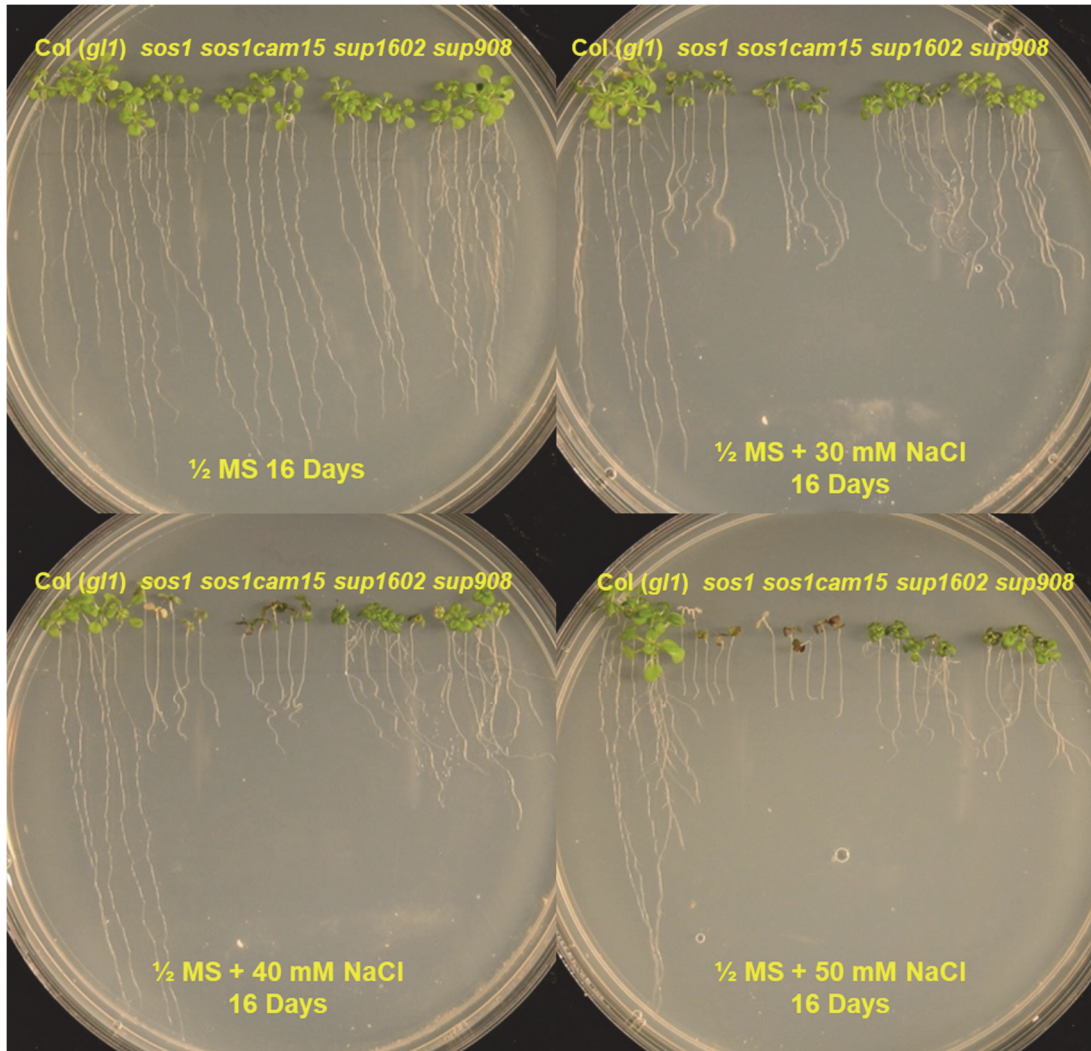

**Fig. S4. Growth phenotype of *sos1cam15*, *sup1602*, and *sup908* in response to salt stress.** The *sos1cam15* double mutant was obtained by crossing *sos1-1* with the T-DNA insertion mutant *cam15*. The suppressor mutants *sup1602* and *908* were used as controls showing suppression of *sos1-1* salt sensitivity, while the *cam15* mutation did not suppress *sos1-1* salt sensitive phenotype.

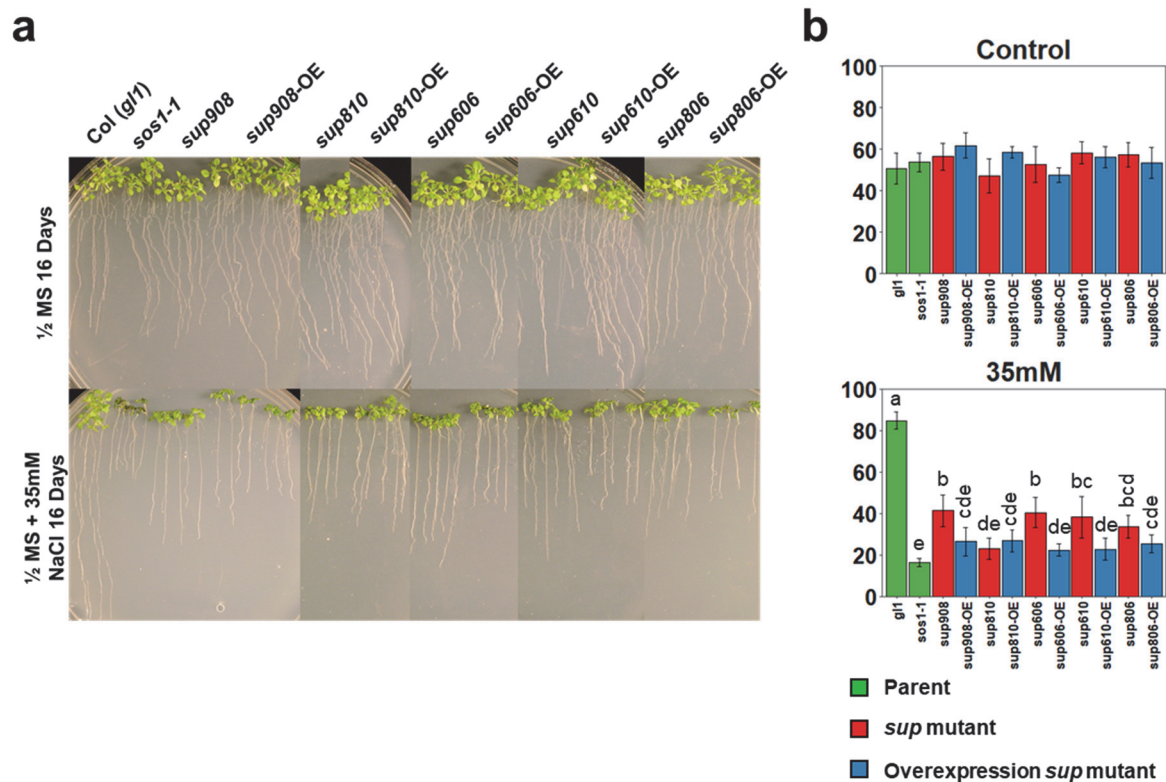

**Fig. S5. Overexpression of the *sup* alleles showed less suppression of *sos1-1* salt sensitivity than the native *sup* alleles. **a** Root growth assay of wild type, *sos1-1*, *sup* mutants and *sup*-OE seedlings. The *sup*-OE genotypes are the transgenic plants overexpressing the *AtNHX1* alleles in the *sos1-1* genetic background using the 35S promoter driven the ORF of the *AtNHX1* alleles. *AtNHX1* ORF cloning and site-directed mutagenesis to generate the *sup* *AtNHX1* alleles were described in “Materials and Methods”. The ORFs of *AtNHX1* alleles were recombined into the plant expression vector pEarleyGate 100 (Earley et al. 2006), and the constructs were transformed into *sos1-1* mutant to generate *sup*-OE plants using the floral dip method (Clough and Bent 1998). Homozygous transgenic lines were selected for salt sensitivity test. **b** Quantitative measurement of the root lengths. Bars represent mean root lengths, and error bars represent standard errors (n = 5). Statistical significance among genotypes within a treatment group was computed with ANOVA and Tukey’s post-hoc HSD test (P < 0.05, n = 5) and different statistical groups are represented by letters.**

| <b>sup1604</b>                     |                             |                                                      |                                            |     |
|------------------------------------|-----------------------------|------------------------------------------------------|--------------------------------------------|-----|
| Zm00001eb330030_P001 (Maize)       | MGLGVVAELVRLGVLSSDSDHASVVS  | INLFLVALLCACIVLGHLLLENRWNESITALIIG                   | 60                                         |     |
| Os07t0666900-01 (Rice)             | --MGMEVVAARLGALYTTSDYASVVS  | INLFLVALLCACIVLGHLLLENRWNESITALIIG                   | 58                                         |     |
| Glyma.10g158700.1.p (Soybean)      | -MVFEISSVSKLQTLSTSDHASVVS   | MNLFVALLCGCIVLGHLLLENRWNESITALIIG                    | 59                                         |     |
| Gohir.A11G237700.1 (Cotton)        | MVAPQLAAVFTKQLTLSTSDHASVVS  | MNIFVALLCACIVIGHLLLENRWNESITALIIG                    | 60                                         |     |
| sp Q68KI4 NHX1_ARATH (Arabidopsis) | ----MLDSLVSKLPSLSTSDHASVVAL | NLFLVALLCACIVLGHLLLENRWNESITALIIG                    | 56                                         |     |
|                                    |                             | :***:***:.*:*****.***:*****:*****:***                |                                            |     |
| <b>sup806</b>                      |                             |                                                      |                                            |     |
| Zm00001eb330030_P001               | VFGEGVNDATSVVLFNALQNF       | LDLHIDAVVNLFLGNFCYLFVSSTLLGVFTGLLSAYI                | 240                                        |     |
| Os07t0666900-01                    | VFGEGVNDATSI                | VLFNALQNFDLVHIDA                                     | 238                                        |     |
| Glyma.10g158700.1.p                | VFGEGVNDATSVVLFNAIQSF       | DLNQIDSSIAVHFLGNFLYLFI                               | 239                                        |     |
| Gohir.A11G237700.1_UTX-TM1_v2.1    | VFGEGVNDATSVVLFNAIQSF       | DLVNTSPRILLEFIGSFLYLFI                               | 240                                        |     |
| sp Q68KI4 NHX1_ARATH               | VFGEGVNDATSVVVFNAIQSF       | DLTHLNHEAAFHLLGNFLYLFI                               | 236                                        |     |
|                                    |                             | *****:***:*.*** : . . .:*. * ***: **:. **:. **:.***: |                                            |     |
| <b>sup610 sup606</b>               |                             | <b>sup810</b>                                        |                                            |     |
| Zm00001eb330030_P001               | IKKLYIGRHSTDR               | VA                                                   | LMMLMAYLSYMLAELLDL                         | 300 |
| Os07t0666900-01                    | IKKLYIGRHSTDR               | VA                                                   | LMMLMAYLSYMLAELLDL                         | 298 |
| Glyma.10g158700.1.p                | IKKLYIGRHSTDR               | VA                                                   | LMMLMAYLSYMLAELCYL                         | 299 |
| Gohir.A11G237700.1_UTX-TM1_v2.1    | IKKLYFGRHSTDR               | VA                                                   | LMMLMAYLSYMAELFY                           | 300 |
| sp Q68KI4 NHX1_ARATH               | IKKLYFGRHSTDR               | VA                                                   | LMMLMAYLSYMLAELFDL                         | 296 |
|                                    |                             |                                                      | *****:*****.*****:*** **                   |     |
| <b>sup1602</b>                     |                             | <b>sup908</b>                                        |                                            |     |
| Zm00001eb330030_P001               | QGSDIETGSAQIVR              | PSSLRMLLSK                                           | THTVHYYWRKFDDALMR                          | 532 |
| Os07t0666900-01                    | QGSdleST-TNIVR              | PSSLRMLLTK                                           | THTVHYYWRKFDDALMR                          | 529 |
| Glyma.10g158700.1.p                | QSEVDIDGHD                  | IHRPSSIRALLT                                         | THTVHRLWRKFDDAFMR                          | 539 |
| Gohir.A11G237700.1_UTX-TM1_v2.1    | QDSFD-DSLIGV                | HRENSIRALLT                                          | TAHTVHYYWRKFDNAFMR                         | 533 |
| sp Q68KI4 NHX1_ARATH               | SFIEP-SGNHN                 | VPRPDSIRGFLTR                                        | TRTVHYYWRQFDDSFMR                          | 529 |
|                                    |                             |                                                      | . : **.*: * : *.:*** **:*:***:*****. ***** |     |
| Zm00001eb330030_P001               | QSVHDGR---                  | 539                                                  |                                            |     |
| Os07t0666900-01                    | QSHGGR----                  | 535                                                  |                                            |     |
| Glyma.10g158700.1.p                | RNGHQWR---                  | 546                                                  |                                            |     |
| Gohir.A11G237700.1_UTX-TM1_v2.1    | RSEPNLPQWQ                  | 543                                                  |                                            |     |
| sp Q68KI4 NHX1_ARATH               | RNPPDLSKA-                  | 538                                                  |                                            |     |
|                                    |                             |                                                      |                                            | :.  |

**Fig. S6. Partial sequence alignment of NHX1 homologs in Arabidopsis and major crop species.** NHX1 homologs in major crop species (maize, rice, soybean, and cotton) were aligned and compared to the Arabidopsis AtNHX1 protein. Residues wherein mutations were identified in the *sup* lines are highlighted. Residues in yellow are not conserved in the other crop species compared to Arabidopsis, while residues in green are conserved in all species shown.
